# Supplementary material for: Identification of Potential Inhibitors for the Treatment of Alkaptonuria Using an Integrated In Silico Computational Strategy
Source: MDPI journal article supplement (doi:10.3390/molecules28062623), 2023-03-14
Supplement: s1 [file s1]

Article

# Identification of Potential Inhibitors for the Treatment of Alkaptonuria Using an Integrated In Silico Computational Strategy

Sumera Zaib <sup>1,\*</sup>, Nehal Rana <sup>1</sup>, Nadia Hussain <sup>2,3</sup>, Hanan A. Ogaly <sup>4,5</sup> Ayed A. Dera <sup>6</sup> and Imtiaz Khan <sup>7,\*</sup>

<sup>1</sup> Department of Basic and Applied Chemistry, Faculty of Science and Technology, University of Central Punjab, Lahore-54590, Pakistan

<sup>2</sup> Department of Pharmaceutical Sciences, College of Pharmacy, Al Ain University, Al Ain, UAE

<sup>3</sup> AAU Health and Biomedical Research Center, Al Ain University, Abu Dhabi, UAE

<sup>4</sup> Chemistry Department, College of Science, King Khalid University, Abha 61421, Saudi Arabia

<sup>5</sup> Biochemistry and Molecular Biology Department, Faculty of Veterinary Medicine, Cairo University, Giza 12211, Egypt

<sup>6</sup> Department of Clinical Laboratory Sciences, College of Applied Medical Sciences, King Khalid University, Abha, Saudi Arabia

<sup>7</sup> Manchester Institute of Biotechnology, The University of Manchester, 131 Princess Street, Manchester M1 7DN, United Kingdom

\* Correspondence: sumera.zaib@ucp.edu.pk (S.Z.); kintiaz@hotmail.co.uk (I.K.)

## Supporting Information

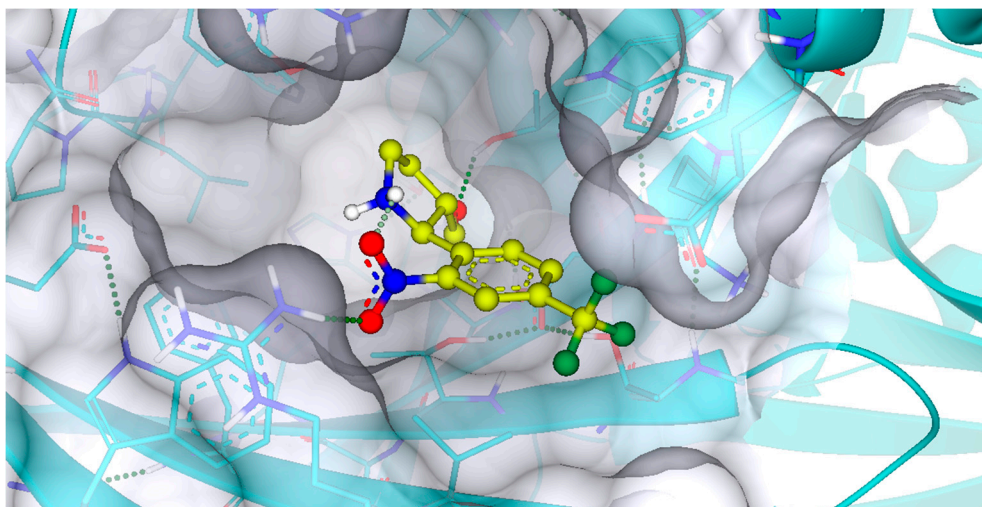

**Figure S1.** Docking complex of best hit of compound **a** on the basis of highest affinity, minimum binding energy, no or minimum torsion as well as the absence of any intra- and inter-molecular clashes.

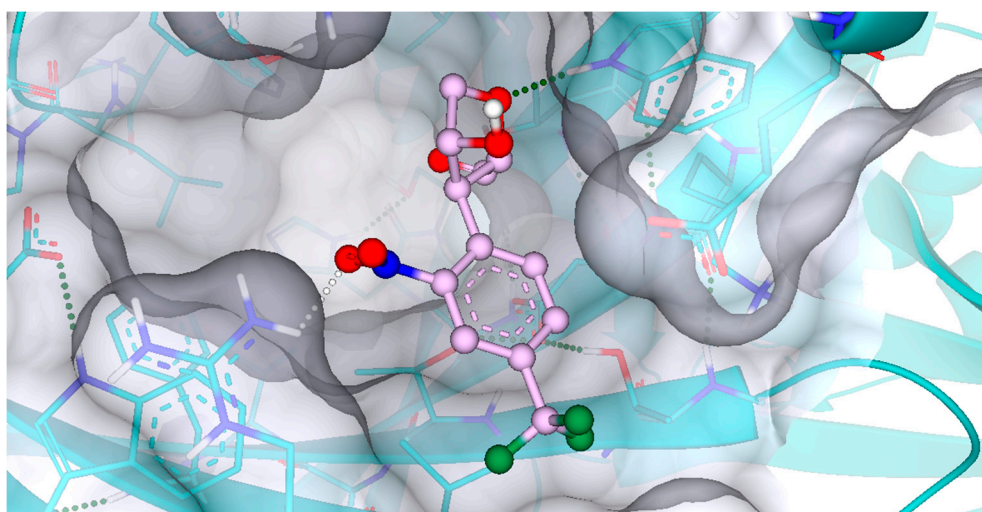

**Figure S2.** Docking complex of best hit of compound **b** on the basis of highest affinity, minimum binding energy, no or minimum torsion as well as the absence of any intra- and inter-molecular clashes.

## Supporting Information

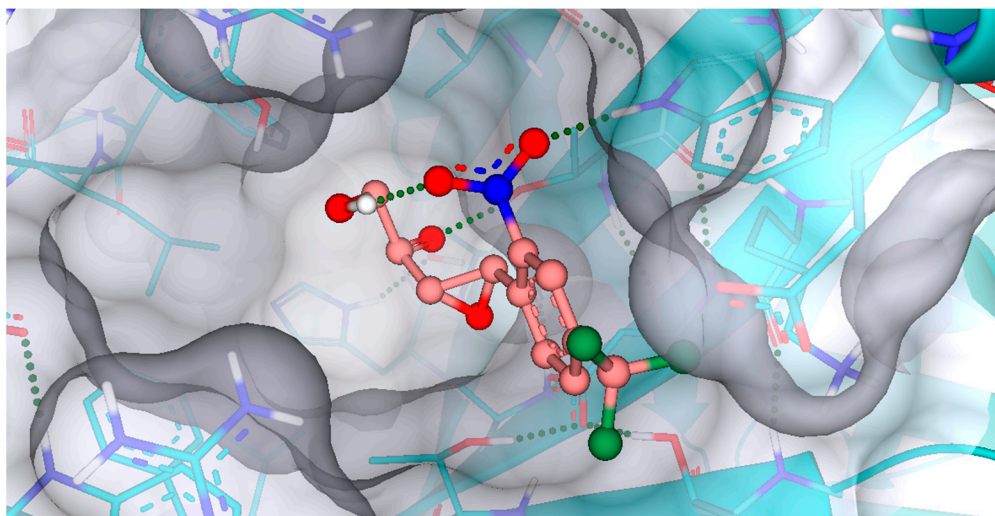

**Figure S3.** Docking complex of best hit of compound **d** on the basis of highest affinity, minimum binding energy, no or minimum torsion as well as the absence of any intra- and inter-molecular clashes.

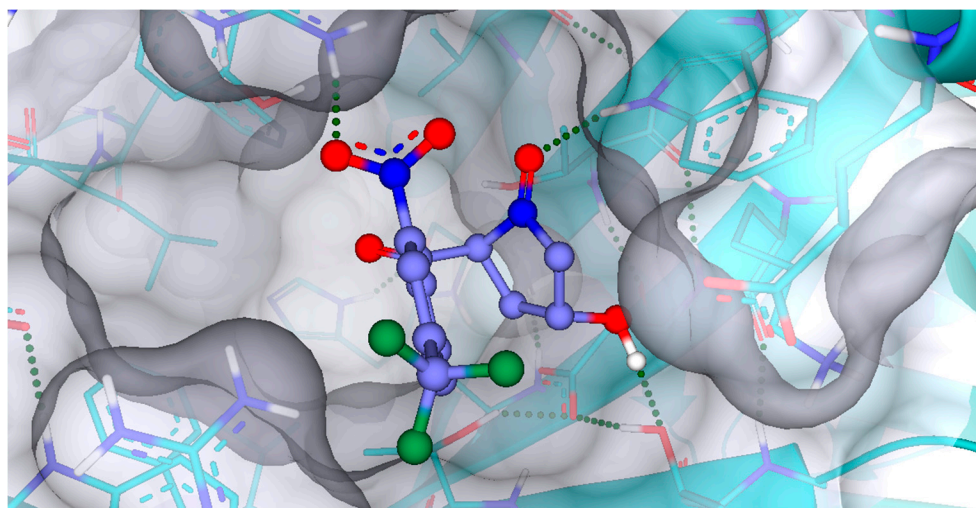

**Figure S4.** Docking complex of best hit of compound **e** on the basis of highest affinity, minimum binding energy, no or minimum torsion as well as the absence of any intra- and inter-molecular clashes.

## Supporting Information

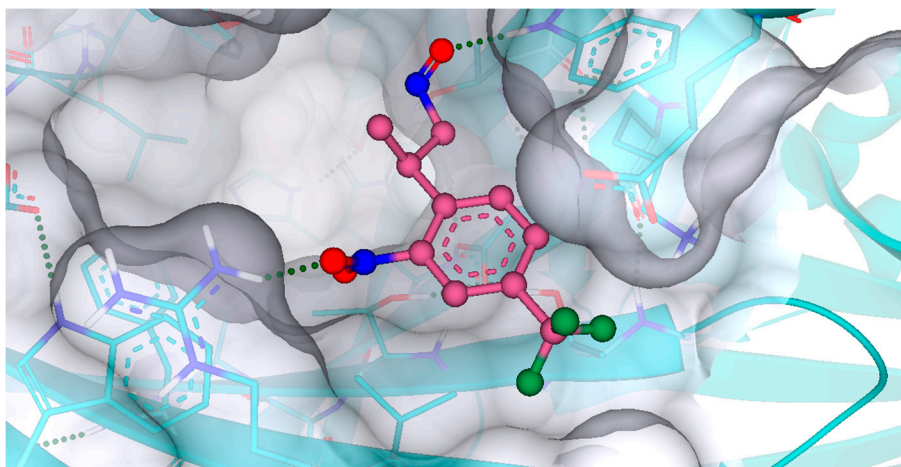

**Figure S5.** Docking complex of best hit of compound **g** on the basis of highest affinity, minimum binding energy, no or minimum torsion as well as the absence of any intra- and inter-molecular clashes.

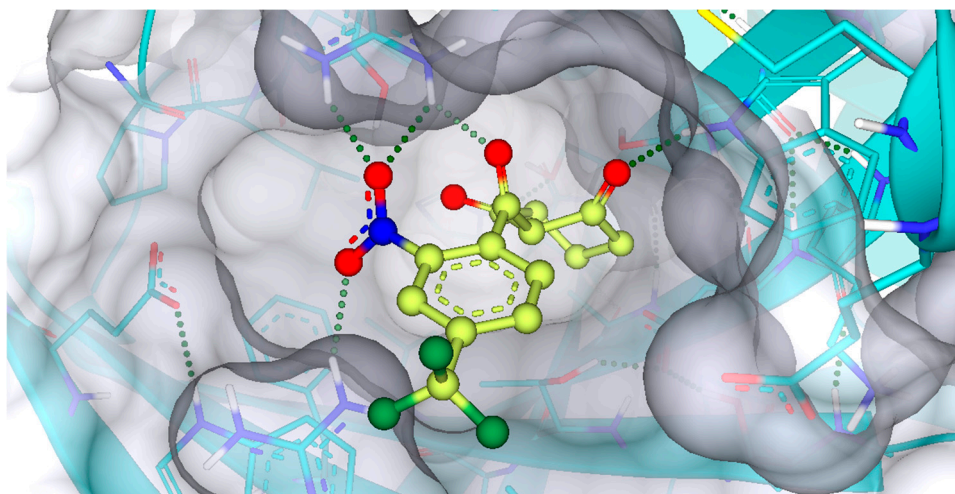

**Figure S6.** Docking complex of best hit of compound **h** on the basis of highest affinity, minimum binding energy, no or minimum torsion as well as the absence of any intra- and inter-molecular clashes.

## Supporting Information

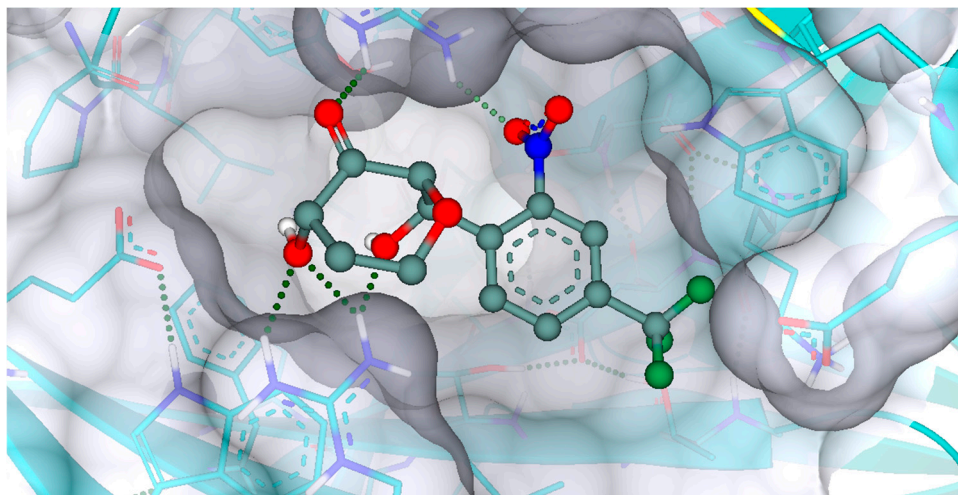

**Figure S7.** Docking complex of best hit of compound **i** on the basis of highest affinity, minimum binding energy, no or minimum torsion as well as the absence of any intra- and inter-molecular clashes.

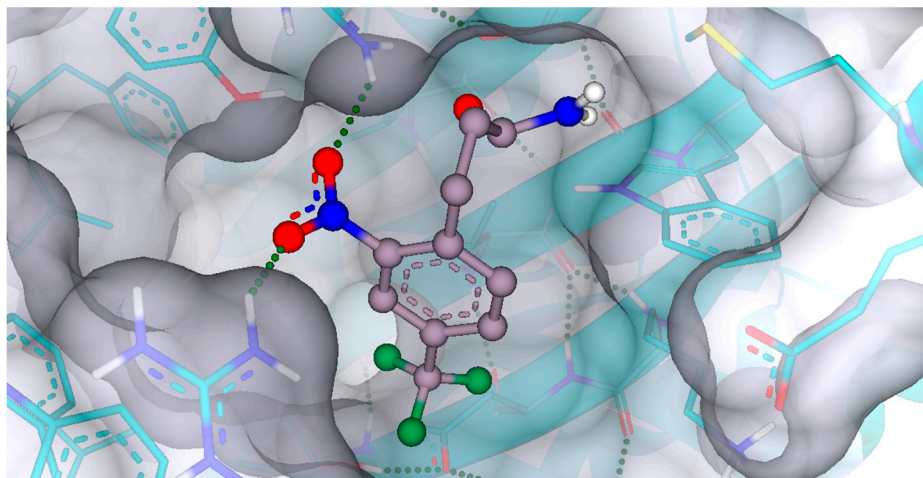

**Figure S8.** Docking complex of best hit of compound **j** on the basis of highest affinity, minimum binding energy, no or minimum torsion as well as the absence of any intra- and inter-molecular clashes.
